# Supplementary material for: Assumptions in ecosystem service assessments: Increasing transparency for conservation
Source: PubMed Central journal article supplement (PMC7782657; doi:10.1007/s13280-020-01379-9), 2020-09-11
Supplement: 13280_2020_1379_MOESM1_ESM.pdf [file 13280_2020_1379_MOESM1_ESM.pdf]

**Ambio**

Electronic Supplementary Material

*This supplementary material has not been peer reviewed*

Title: **Assumptions in ecosystem service assessments: Increasing transparency for conservation**

Matthias Schröter, Emilie Crouzat, Lisanne Hölting, Julian Massenberg, Julian Rode, Mario Hanisch, Nadja Kabisch, Julia Palliwoda, Jörg A. Priess, Ralf Seppelt, Michael Beckmann

**Table S1: Participants of the workshop**

| Participants (anonymised) | Career stage     | Discipline                         |
|---------------------------|------------------|------------------------------------|
| Participant 1             | Postdoc          | Environmental sciences             |
| Participant 2             | Postdoc          | Terrestrial ecology                |
| Participant 3             | Postdoc          | Environmental sciences             |
| Participant 4             | PhD candidate    | Environmental sciences             |
| Participant 5             | PhD candidate    | Environmental/ecological economics |
| Participant 6             | Senior scientist | Behavioural economics              |
| Participant 7             | PhD candidate    | Geo-ecology                        |
| Participant 8             | Senior scientist | Urban ecology                      |
| Participant 9             | PhD candidate    | Urban ecology                      |
| Participant 10            | Senior scientist | Environmental sciences             |
| Participant 11            | Professor        | Environmental sciences             |
| Participant 12            | Senior scientist | Environmental/ecological economics |
| Participant 13            | Senior scientist | Environmental sciences             |
| Participant 14            | Professor        | Conservation biology               |

**Table S2: Extraction sheet used for review of the papers, based on the preliminary list of assumptions identified during the expert workshop**

|                                                                                                       |                                                                                                                                                                                                                   |
|-------------------------------------------------------------------------------------------------------|-------------------------------------------------------------------------------------------------------------------------------------------------------------------------------------------------------------------|
| <b>A) Using the ecosystem service concept</b>                                                         | <b>1. Implicit underlying philosophical assumptions</b>                                                                                                                                                           |
|                                                                                                       | Consequentialism, anthropocentrism, instrumentalism                                                                                                                                                               |
|                                                                                                       | Nature is (only) positive                                                                                                                                                                                         |
|                                                                                                       | Multifunctionality is positive/sustainable                                                                                                                                                                        |
|                                                                                                       | Level of ES use is sustainable                                                                                                                                                                                    |
|                                                                                                       | ES concept applicable globally                                                                                                                                                                                    |
|                                                                                                       | <b>2. Assuming that different aspects/components of ecosystem services are conceptually equal</b>                                                                                                                 |
| Ecological processes, potential provision, use, demand are set equal (indicator and conceptual level) |                                                                                                                                                                                                                   |
| <b>B) Biophysical data collection, indication, mapping, and modelling</b>                             | <b>3. Assuming temporal, spatial and context-specific appropriateness and representativity for different study purposes.</b>                                                                                      |
|                                                                                                       | Appropriateness of 1-time step analysis                                                                                                                                                                           |
|                                                                                                       | Appropriateness of homogeneous spatial distribution                                                                                                                                                               |
|                                                                                                       | Closed systems, provision of ES across scales neglected                                                                                                                                                           |
|                                                                                                       | Representativity or appropriateness of ES lists                                                                                                                                                                   |
|                                                                                                       | <b>4. Assuming reliability of ecosystem service indicators.</b>                                                                                                                                                   |
|                                                                                                       | Indicators credibly represent different aspects of ES                                                                                                                                                             |
|                                                                                                       | <b>5. Assuming temporal and spatial stationarity.</b>                                                                                                                                                             |
|                                                                                                       | Temporal dynamics constant, state is not close to ecological thresholds                                                                                                                                           |
|                                                                                                       | Underlying social-ecological conditions stable, demand stable over time                                                                                                                                           |
|                                                                                                       | Land use and land cover as ES indicators                                                                                                                                                                          |
|                                                                                                       | <b>6. Assuming quantities and values of ecosystem services through expert-based assessments.</b>                                                                                                                  |
|                                                                                                       | Expert-based judgements                                                                                                                                                                                           |
|                                                                                                       | Bayesian belief networks (weighing and interactions)                                                                                                                                                              |
| Who is an expert and how different knowledge systems may agree or disagree                            |                                                                                                                                                                                                                   |
| <b>7. Assuming no interactions between ecosystem services.</b>                                        |                                                                                                                                                                                                                   |
| Compatibility: provision of one ES does not affect the provision of another ES                        |                                                                                                                                                                                                                   |
| Optimisation for only one ES while ignoring interactions.                                             |                                                                                                                                                                                                                   |
| <b>C) Socio-economic valuation and value aggregation</b>                                              | <b>8. Assuming that people are economically rational</b>                                                                                                                                                          |
|                                                                                                       | Neo-classical economic theory: economic rationality, maximize individual utility, have complete information, know their preferences, have preferences that are stable over time and independent of social context |
|                                                                                                       | Utility can be approximated through monetary measures                                                                                                                                                             |
|                                                                                                       | <b>9. Assuming transferability and generalisability of values across socioeconomic and cultural contexts.</b>                                                                                                     |
|                                                                                                       | ES values independent of the socio-economic and cultural context                                                                                                                                                  |
|                                                                                                       | Benefit transfer of average value coefficients: homogeneous distribution, comparable socio-economic context, and similarity across time                                                                           |
|                                                                                                       | <b>10. Assuming that welfare can be aggregated over space and time.</b>                                                                                                                                           |
|                                                                                                       | Aggregating individual values meaningful                                                                                                                                                                          |
| Equal importance of multiple ES                                                                       |                                                                                                                                                                                                                   |
| Two values from different value domains can be compared and traded-off                                |                                                                                                                                                                                                                   |
| <b>D) Using results for decision-making</b>                                                           | <b>11. Assuming relevance for societal decisions.</b>                                                                                                                                                             |
|                                                                                                       | Selection and a quantification of assessed ES is representative for a concerned group of stakeholders                                                                                                             |
|                                                                                                       | Raises awareness, is policy relevant and applicable, and motivates decision-makers to take action. Strategic use for environmental advocacy, in particular monetary valuation relevant for decision making        |

**Table S3: 70 published ecosystem service assessments that were used to refine the typology.**

| Authors                                                                                                        | Year | Title                                                                                                                                                                   | Journal                                                                         | DOI                               |
|----------------------------------------------------------------------------------------------------------------|------|-------------------------------------------------------------------------------------------------------------------------------------------------------------------------|---------------------------------------------------------------------------------|-----------------------------------|
| Raudsepp-Hearne, C; Peterson, GD; Bennett, EM                                                                  | 2010 | Ecosystem service bundles for analyzing tradeoffs in diverse landscapes                                                                                                 | PROCEEDINGS OF THE NATIONAL ACADEMY OF SCIENCES OF THE UNITED STATES OF AMERICA | 10.1073/pnas.0907284107           |
| Eigenbrod, F; Armsworth, PR; Anderson, BJ; Heinemeyer, A; Gillings, S; Roy, DB; Thomas, CD; Gaston, KJ         | 2010 | The impact of proxy-based methods on mapping the distribution of ecosystem services                                                                                     | JOURNAL OF APPLIED ECOLOGY                                                      | 10.1111/j.1365-2664.2010.01777.x  |
| Bryan, BA; Raymond, CM; Crossman, ND; Macdonald, DH                                                            | 2010 | Targeting the management of ecosystem services based on social values: Where, what, and how?                                                                            | LANDSCAPE AND URBAN PLANNING                                                    | 10.1016/j.landurbplan.2010.05.002 |
| Birch, JC; Newton, AC; Aquino, CA; Cantarello, E; Echeverria, C; Kitzberger, T; Schiappacasse, I; Garavito, NT | 2010 | Cost-effectiveness of dryland forest restoration evaluated by spatial analysis of ecosystem services                                                                    | PROCEEDINGS OF THE NATIONAL ACADEMY OF SCIENCES OF THE UNITED STATES OF AMERICA | 10.1073/pnas.1003369107           |
| Li, TH; Li, WK; Qian, ZH                                                                                       | 2010 | Variations in ecosystem service value in response to land use changes in Shenzhen                                                                                       | ECOLOGICAL ECONOMICS                                                            | 10.1016/j.ecolecon.2008.05.018    |
| Jenkins, WA; Murray, BC; Kramer, RA; Faulkner, SP                                                              | 2010 | Valuing ecosystem services from wetlands restoration in the Mississippi Alluvial Valley                                                                                 | ECOLOGICAL ECONOMICS                                                            | 10.1016/j.ecolecon.2009.11.022    |
| de Lange, WJ; van Wilgen, BW                                                                                   | 2010 | An economic assessment of the contribution of biological control to the management of invasive alien plants and to the protection of ecosystem services in South Africa | BIOLOGICAL INVASIONS                                                            | 10.1007/s10530-010-9811-y         |
| Liu, SA; Costanza, R; Troy, A; D'Aagostino, J; Mates, W                                                        | 2010 | Valuing New Jersey's Ecosystem Services and Natural Capital: A Spatially Explicit Benefit Transfer Approach                                                             | ENVIRONMENTAL MANAGEMENT                                                        | 10.1007/s00267-010-9483-5         |
| Eigenbrod, F; Armsworth, PR; Anderson, BJ; Heinemeyer, A; Gillings, S; Roy, DB; Thomas, CD; Gaston, KJ         | 2010 | Error propagation associated with benefits transfer-based mapping of ecosystem services                                                                                 | BIOLOGICAL CONSERVATION                                                         | 10.1016/j.biocon.2010.06.015      |
| Brenner, J; Jimenez, JA; Sarda, R; Garola, A                                                                   | 2010 | An assessment of the non-market value of the ecosystem services provided by the Catalan coastal zone, Spain                                                             | OCEAN & COASTAL MANAGEMENT                                                      | 10.1016/j.ocecoaman.2009.10.008   |
| Sherrouse, BC; Clement, JM;                                                                                    | 2011 | A GIS application for assessing, mapping, and quantifying                                                                                                               | APPLIED GEOGRAPHY                                                               | 10.1016/j.apgeog.2010.08.         |

|                                                                                                                                                                                                                                                                                                     |      |                                                                                                                                                               |                                                         |                                   |
|-----------------------------------------------------------------------------------------------------------------------------------------------------------------------------------------------------------------------------------------------------------------------------------------------------|------|---------------------------------------------------------------------------------------------------------------------------------------------------------------|---------------------------------------------------------|-----------------------------------|
| Semmens, DJ                                                                                                                                                                                                                                                                                         |      | the social values of ecosystem services                                                                                                                       |                                                         | 002                               |
| Davies, ZG; Edmondson, JL;<br>Heinemeyer, A; Leake, JR; Gaston, KJ                                                                                                                                                                                                                                  | 2011 | Mapping an urban ecosystem service: quantifying above-ground carbon storage at a city-wide scale                                                              | JOURNAL OF APPLIED ECOLOGY                              | 10.1111/j.1365-2664.2011.02021.x  |
| Dobbs, C; Escobedo, FJ; Zipperer, WC                                                                                                                                                                                                                                                                | 2011 | A framework for developing urban forest ecosystem services and goods indicators                                                                               | LANDSCAPE AND URBAN PLANNING                            | 10.1016/j.landurbplan.2010.11.004 |
| Lautenbach, S; Kugel, C; Lausch, A; Seppelt, R                                                                                                                                                                                                                                                      | 2011 | Analysis of historic changes in regional ecosystem service provisioning using land use data                                                                   | ECOLOGICAL INDICATORS                                   | 10.1016/j.ecolind.2010.09.007     |
| Swetnam, RD; Fisher, B; Mbilinyi, BP;<br>Munishi, PKT; Willcock, S; Ricketts, T;<br>Mwakalila, S; Balmford, A; Burgess, ND;<br>Marshall, AR; Lewis, SL                                                                                                                                              | 2011 | Mapping socio-economic scenarios of land cover change: A GIS method to enable ecosystem service modelling                                                     | JOURNAL OF ENVIRONMENTAL MANAGEMENT                     | 10.1016/j.jenvman.2010.09.007     |
| Kenter, JO; Hyde, T; Christie, M;<br>Fazey, I                                                                                                                                                                                                                                                       | 2011 | The importance of deliberation in valuing ecosystem services in developing countries-Evidence from the Solomon Islands                                        | GLOBAL ENVIRONMENTAL CHANGE-HUMAN AND POLICY DIMENSIONS | 10.1016/j.gloenvcha.2011.01.001   |
| Martin-Lopez, B; Garcia-Llorente, M;<br>Palomo, I; Montes, C                                                                                                                                                                                                                                        | 2011 | The conservation against development paradigm in protected areas: Valuation of ecosystem services in the Donana social-ecological system (southwestern Spain) | ECOLOGICAL ECONOMICS                                    | 10.1016/j.ecolecon.2011.03.009    |
| Higgins, CB; Stephenson, K; Brown, BL                                                                                                                                                                                                                                                               | 2011 | Nutrient Bioassimilation Capacity of Aquacultured Oysters: Quantification of an Ecosystem Service                                                             | JOURNAL OF ENVIRONMENTAL QUALITY                        | 10.2134/jeq2010.0203              |
| Watanabe, MDB; Ortega, E                                                                                                                                                                                                                                                                            | 2011 | Ecosystem services and biogeochemical cycles on a global scale: valuation of water, carbon and nitrogen processes                                             | ENVIRONMENTAL SCIENCE & POLICY                          | 10.1016/j.envsci.2011.05.013      |
| Fisher, B; Turner, RK; Burgess, ND;<br>Swetnam, RD; Green, J; Green, RE;<br>Kajembe, G; Kulindwa, K; Lewis, SL;<br>Marchant, R; Marshall, AR; Madoffe, S;<br>Munishi, PKT; Morse-Jones, S;<br>Mwakalila, S; Paavola, J; Naidoo, R;<br>Ricketts, T; Rouget, M; Willcock, S;<br>White, S; Balmford, A | 2011 | Measuring, modeling and mapping ecosystem services in the Eastern Arc Mountains of Tanzania                                                                   | PROGRESS IN PHYSICAL GEOGRAPHY                          | 10.1177/0309133311422968          |
| van Oudenhoven, APE; Petz, K;<br>Alkemade, R; Hein, L; de Groot, RS                                                                                                                                                                                                                                 | 2012 | Framework for systematic indicator selection to assess effects of land management on ecosystem services                                                       | ECOLOGICAL INDICATORS                                   | 10.1016/j.ecolind.2012.01.012     |

|                                                                                                                                                                                                                                                                                   |      |                                                                                                                                       |                                                                                 |                                  |
|-----------------------------------------------------------------------------------------------------------------------------------------------------------------------------------------------------------------------------------------------------------------------------------|------|---------------------------------------------------------------------------------------------------------------------------------------|---------------------------------------------------------------------------------|----------------------------------|
| White, C; Halpern, BS; Kappel, CV                                                                                                                                                                                                                                                 | 2012 | Ecosystem service tradeoff analysis reveals the value of marine spatial planning for multiple ocean uses                              | PROCEEDINGS OF THE NATIONAL ACADEMY OF SCIENCES OF THE UNITED STATES OF AMERICA | 10.1073/pnas.1114215109          |
| Koschke, L; Furst, C; Frank, S; Makeschin, F                                                                                                                                                                                                                                      | 2012 | A multi-criteria approach for an integrated land-cover-based assessment of ecosystem services provision to support landscape planning | ECOLOGICAL INDICATORS                                                           | 10.1016/j.ecolind.2011.12.010    |
| Lu, YH; Fu, BJ; Feng, XM; Zeng, Y; Liu, Y; Chang, RY; Sun, G; Wu, BF                                                                                                                                                                                                              | 2012 | A Policy-Driven Large Scale Ecological Restoration: Quantifying Ecosystem Services Changes in the Loess Plateau of China              | PLOS ONE                                                                        | 10.1371/journal.pone.0031782     |
| Haines-Young, R; Potschin, M; Kienast, F                                                                                                                                                                                                                                          | 2012 | Indicators of ecosystem service potential at European scales: Mapping marginal changes and trade-offs                                 | ECOLOGICAL INDICATORS                                                           | 10.1016/j.ecolind.2011.09.004    |
| Kroll, F; Muller, F; Haase, D; Fohrer, N                                                                                                                                                                                                                                          | 2012 | Rural-urban gradient analysis of ecosystem services supply and demand dynamics                                                        | LAND USE POLICY                                                                 | 10.1016/j.landusepol.2011.07.008 |
| Su, SL; Xiao, R; Jiang, ZL; Zhang, Y                                                                                                                                                                                                                                              | 2012 | Characterizing landscape pattern and ecosystem service value changes for urbanization impacts at an eco-regional scale                | APPLIED GEOGRAPHY                                                               | 10.1016/j.apgeog.2011.12.001     |
| Grabowski, JH; Brumbaugh, RD; Conrad, RF; Keeler, AG; Opaluch, JJ; Peterson, CH; Piehler, MF; Powers, SP; Smyth, AR                                                                                                                                                               | 2012 | Economic Valuation of Ecosystem Services Provided by Oyster Reefs                                                                     | BIOSCIENCE                                                                      | 10.1525/bio.2012.62.10.10        |
| Tengberg, A; Fredholm, S; Eliasson, I; Knez, I; Saltzman, K; Wetterberg, O                                                                                                                                                                                                        | 2012 | Cultural ecosystem services provided by landscapes: Assessment of heritage values and identity                                        | ECOSYSTEM SERVICES                                                              | 10.1016/j.ecoser.2012.07.006     |
| Nedkov, S; Burkhard, B                                                                                                                                                                                                                                                            | 2012 | Flood regulating ecosystem services-Mapping supply and demand, in the Etropole municipality, Bulgaria                                 | ECOLOGICAL INDICATORS                                                           | 10.1016/j.ecolind.2011.06.022    |
| Allan, JD; McIntyre, PB; Smith, SDP; Halpern, BS; Boyer, GL; Buchsbaum, A; Burton, GA; Campbell, LM; Chadderton, WL; Ciborowski, JJH; Doran, PJ; Eder, T; Infante, DM; Johnson, LB; Joseph, CA; Marino, AL; Prusevich, A; Read, JG; Rose, JB; Rutherford, ES; Sowa, SP; Steinman, | 2013 | Joint analysis of stressors and ecosystem services to enhance restoration effectiveness                                               | PROCEEDINGS OF THE NATIONAL ACADEMY OF SCIENCES OF THE UNITED STATES OF AMERICA | 10.1073/pnas.1213841110          |

|                                                                                                                               |      |                                                                                                                                                                     |                                      |                                   |
|-------------------------------------------------------------------------------------------------------------------------------|------|---------------------------------------------------------------------------------------------------------------------------------------------------------------------|--------------------------------------|-----------------------------------|
| AD                                                                                                                            |      |                                                                                                                                                                     |                                      |                                   |
| Palomo, I; Martin-Lopez, B; Potschin, M; Haines-Young, R; Montes, C                                                           | 2013 | National Parks, buffer zones and surrounding lands: Mapping ecosystem service flows                                                                                 | ECOSYSTEM SERVICES                   | 10.1016/j.ecoser.2012.09.001      |
| Larondelle, N; Haase, D                                                                                                       | 2013 | Urban ecosystem services assessment along a rural-urban gradient: A cross-analysis of European cities                                                               | ECOLOGICAL INDICATORS                | 10.1016/j.ecolind.2012.12.022     |
| Feng, XM; Fu, BJ; Lu, N; Zeng, Y; Wu, BF                                                                                      | 2013 | How ecological restoration alters ecosystem services: an analysis of carbon sequestration in China's Loess Plateau                                                  | SCIENTIFIC REPORTS                   | 10.1038/srep02846                 |
| Leh, MDK; Matlock, MD; Cummings, EC; Nalley, LL                                                                               | 2013 | Quantifying and mapping multiple ecosystem services change in West Africa                                                                                           | AGRICULTURE ECOSYSTEMS & ENVIRONMENT | 10.1016/j.agee.2012.12.001        |
| Garcia-Nieto, AP; Garcia-Llorente, M; Iniesta-Arandia, I; Martin-Lopez, B                                                     | 2013 | Mapping forest ecosystem services: From providing units to beneficiaries                                                                                            | ECOSYSTEM SERVICES                   | 10.1016/j.ecoser.2013.03.003      |
| Jackson, B; Pagella, T; Sinclair, F; Orellana, B; Henshaw, A; Reynolds, B; Mcintyre, N; Wheeler, H; Eycott, A                 | 2013 | Polyscape: A GIS mapping framework providing efficient and spatially explicit landscape-scale valuation of multiple ecosystem services                              | LANDSCAPE AND URBAN PLANNING         | 10.1016/j.landurbplan.2012.12.014 |
| Butterfield, BJ; Suding, KN                                                                                                   | 2013 | Single-trait functional indices outperform multi-trait indices in linking environmental gradients and ecosystem services in a complex landscape                     | JOURNAL OF ECOLOGY                   | 10.1111/1365-2745.12013           |
| Butler, JRA; Wong, GY; Metcalfe, DJ; Honzak, M; Pert, PL; Rao, N; van Grieken, ME; Lawson, T; Bruce, C; Kroon, FJ; Brodie, JE | 2013 | An analysis of trade-offs between multiple ecosystem services and stakeholders linked to land use and water quality management in the Great Barrier Reef, Australia | AGRICULTURE ECOSYSTEMS & ENVIRONMENT | 10.1016/j.agee.2011.08.017        |
| Fontana, V; Radtke, A; Fedrigotti, VB; Tappeiner, U; Tasser, E; Zerbe, S; Buchholz, T                                         | 2013 | Comparing land-use alternatives: Using the ecosystem services concept to define a multi-criteria decision analysis                                                  | ECOLOGICAL ECONOMICS                 | 10.1016/j.ecolecon.2013.05.007    |
| van Berkel, DB; Verburg, PH                                                                                                   | 2014 | Spatial quantification and valuation of cultural ecosystem services in an agricultural landscape                                                                    | ECOLOGICAL INDICATORS                | 10.1016/j.ecolind.2012.06.025     |
| Schroter, M; Barton, DN; Remme, RP; Hein, L                                                                                   | 2014 | Accounting for capacity and flow of ecosystem services: A conceptual model and a case study for Telemark, Norway                                                    | ECOLOGICAL INDICATORS                | 10.1016/j.ecolind.2013.09.018     |
| Paracchini, ML; Zulian, G; Kopperoinen, L; Maes, J; Schagner, JP; Termansen, M; Zandersen, M; Perez-Soba, M; Scholefield, PA; | 2014 | Mapping cultural ecosystem services: A framework to assess the potential for outdoor recreation across the EU                                                       | ECOLOGICAL INDICATORS                | 10.1016/j.ecolind.2014.04.018     |

|                                                                                         |      |                                                                                                                                              |                                                         |                                 |
|-----------------------------------------------------------------------------------------|------|----------------------------------------------------------------------------------------------------------------------------------------------|---------------------------------------------------------|---------------------------------|
| Bidoglio, G                                                                             |      |                                                                                                                                              |                                                         |                                 |
| Schulp, CJE; Lautenbach, S; Verburg, PH                                                 | 2014 | Quantifying and mapping ecosystem services: Demand and supply of pollination in the European Union                                           | ECOLOGICAL INDICATORS                                   | 10.1016/j.ecolind.2013.07.014   |
| Bagstad, KJ; Villa, F; Batker, D; Harrison-Cox, J; Voigt, B; Johnson, GW                | 2014 | From theoretical to actual ecosystem services: mapping beneficiaries and spatial flows in ecosystem service assessments                      | ECOLOGY AND SOCIETY                                     | 10.5751/ES-06523-190264         |
| Serna-Chavez, HM; Schulp, CJE; van Bodegom, PM; Bouten, W; Verburg, PH; Davidson, MD    | 2014 | A quantitative framework for assessing spatial flows of ecosystem services                                                                   | ECOLOGICAL INDICATORS                                   | 10.1016/j.ecolind.2013.11.024   |
| Sturck, J; Poortinga, A; Verburg, PH                                                    | 2014 | Mapping ecosystem services: The supply and demand of flood regulation services in Europe                                                     | ECOLOGICAL INDICATORS                                   | 10.1016/j.ecolind.2013.11.010   |
| Larondelle, N; Haase, D; Kabisch, N                                                     | 2014 | Mapping the diversity of regulating ecosystem services in European cities                                                                    | GLOBAL ENVIRONMENTAL CHANGE-HUMAN AND POLICY DIMENSIONS | 10.1016/j.gloenvcha.2014.04.008 |
| Oteros-Rozas, E; Martin-Lopez, B; Gonzalez, JA; Plieninger, T; Lopez, CA; Montes, C     | 2014 | Socio-cultural valuation of ecosystem services in a transhumance social-ecological network                                                   | REGIONAL ENVIRONMENTAL CHANGE                           | 10.1007/s10113-013-0571-y       |
| Iniesta-Arandia, I; Garcia-Llorente, M; Aguilera, PA; Montes, C; Martin-Lopez, B        | 2014 | Socio-cultural valuation of ecosystem services: uncovering the links between values, drivers of change, and human well-being                 | ECOLOGICAL ECONOMICS                                    | 10.1016/j.ecolecon.2014.09.028  |
| Queiroz, C; Meacham, M; Richter, K; Norstrom, AV; Andersson, E; Norberg, J; Peterson, G | 2015 | Mapping bundles of ecosystem services reveals distinct types of multifunctionality within a Swedish landscape                                | AMBIO                                                   | 10.1007/s13280-014-0601-0       |
| Song, W; Deng, XZ; Yuan, YW; Wang, Z; Li, ZH                                            | 2015 | Impacts of land-use change on valued ecosystem service in rapidly urbanized North China Plain                                                | ECOLOGICAL MODELLING                                    | 10.1016/j.ecolmodel.2015.01.029 |
| Derkzen, ML; van Teeffelen, AJA; Verburg, PH                                            | 2015 | REVIEW Quantifying urban ecosystem services based on high-resolution data of urban green space: an assessment for Rotterdam, the Netherlands | JOURNAL OF APPLIED ECOLOGY                              | 10.1111/1365-2664.12469         |
| Baro, F; Haase, D; Gomez-Baggethun, E; Frantzeskaki, N                                  | 2015 | Mismatches between ecosystem services supply and demand in urban areas: A quantitative assessment in five European cities                    | ECOLOGICAL INDICATORS                                   | 10.1016/j.ecolind.2015.03.013   |
| Richards, DR; Friess, DA                                                                | 2015 | A rapid indicator of cultural ecosystem service usage at a                                                                                   | ECOLOGICAL INDICATORS                                   | 10.1016/j.ecolind.2015.01.      |

|                                                                                                    |      |                                                                                                                                                                  |                                          |                                   |
|----------------------------------------------------------------------------------------------------|------|------------------------------------------------------------------------------------------------------------------------------------------------------------------|------------------------------------------|-----------------------------------|
|                                                                                                    |      | fine spatial scale: Content analysis of social media photographs                                                                                                 |                                          | 034                               |
| Hayha, T; Franzese, PP; Paletto, A; Fath, BD                                                       | 2015 | Assessing, valuing, and mapping ecosystem services in Alpine forests                                                                                             | ECOSYSTEM SERVICES                       | 10.1016/j.ecoser.2015.03.001      |
| Blaen, PJ; Jia, L; Peh, KSH; Field, RH; Balmford, A; MacDonald, MA; Bradbury, RB                   | 2015 | Rapid Assessment of Ecosystem Services Provided by Two Mineral Extraction Sites Restored for Nature Conservation in an Agricultural Landscape in Eastern England | PLOS ONE                                 | 10.1371/journal.pone.0121010      |
| Garcia-Nieto, AP; Quintas-Soriano, C; Garcia-Llorente, M; Palomo, I; Montes, C; Martin-Lopez, B    | 2015 | Collaborative mapping of ecosystem services: The role of stakeholders' profiles                                                                                  | ECOSYSTEM SERVICES                       | 10.1016/j.ecoser.2014.11.006      |
| Liquete, C; Kleeschulte, S; Dige, G; Maes, J; Grizzetti, B; Olah, B; Zulian, G                     | 2015 | Mapping green infrastructure based on ecosystem services and ecological networks: A Pan-European case study                                                      | ENVIRONMENTAL SCIENCE & POLICY           | 10.1016/j.envsci.2015.07.009      |
| Crouzat, E; Mouchet, M; Turkelboom, F; Byczek, C; Meersmans, J; Berger, F; Verkerk, PJ; Lavorel, S | 2015 | Assessing bundles of ecosystem services from regional to landscape scale: insights from the French Alps                                                          | JOURNAL OF APPLIED ECOLOGY               | 10.1111/1365-2664.12502           |
| Tenerelli, P; Demsar, U; Luque, S                                                                  | 2016 | Crowdsourcing indicators for cultural ecosystem services: A geographically weighted approach for mountain landscapes                                             | ECOLOGICAL INDICATORS                    | 10.1016/j.ecolind.2015.12.042     |
| Kindu, M; Schneider, T; Teketay, D; Knoke, T                                                       | 2016 | Changes of ecosystem service values in response to land use/land cover dynamics in Munessa-Shashemene landscape of the Ethiopian highlands                       | SCIENCE OF THE TOTAL ENVIRONMENT         | 10.1016/j.scitotenv.2015.12.127   |
| Czembrowski, P; Kronenberg, J                                                                      | 2016 | Hedonic pricing and different urban green space types and sizes: Insights into the discussion on valuing ecosystem services                                      | LANDSCAPE AND URBAN PLANNING             | 10.1016/j.landurbplan.2015.10.005 |
| Tayyebi, A; Meehan, TD; Dischler, J; Radloff, G; Ferris, M; Gratton, C                             | 2016 | SmartScape (TM): A web-based decision support system for assessing the tradeoffs among multiple ecosystem services under crop-change scenarios                   | COMPUTERS AND ELECTRONICS IN AGRICULTURE | 10.1016/j.compag.2015.12.003      |
| Baro, F; Palomo, I; Zulian, G; Vizcaino, P; Haase, D; Gomez-Baggethun, E                           | 2016 | Mapping ecosystem service capacity, flow and demand for landscape and urban planning: A case study in the Barcelona metropolitan region                          | LAND USE POLICY                          | 10.1016/j.landusepol.2016.06.006  |

|                                                                                                     |      |                                                                                                                                                                          |                                     |                                     |
|-----------------------------------------------------------------------------------------------------|------|--------------------------------------------------------------------------------------------------------------------------------------------------------------------------|-------------------------------------|-------------------------------------|
| Kremer, P; Hamstead, ZA;<br>McPhearson, T                                                           | 2016 | The value of urban ecosystem services in New York City:<br>A spatially explicit multicriteria analysis of landscape<br>scale valuation scenarios                         | ENVIRONMENTAL SCIENCE &<br>POLICY   | 10.1016/j.envsci.2016.04.0<br>12    |
| Jiang, C; Li, DQ; Wang, DW; Zhang, LB                                                               | 2016 | Quantification and assessment of changes in ecosystem<br>service in the Three-River Headwaters Region, China as a<br>result of climate variability and land cover change | ECOLOGICAL INDICATORS               | 10.1016/j.ecolind.2016.01.<br>051   |
| Boithias, L; Terrado, M; Corominas, L;<br>Ziv, G; Kumar, V; Marques, M;<br>Schuhmacher, M; Acuna, V | 2016 | Analysis of the uncertainty in the monetary valuation of<br>ecosystem services - A case study at the river basin scale                                                   | SCIENCE OF THE TOTAL<br>ENVIRONMENT | 10.1016/j.scitotenv.2015.1<br>1.066 |
| Bryce, R; Irvine, KN; Church, A; Fish,<br>R; Ranger, S; Kenter, JO                                  | 2016 | Subjective well-being indicators for large-scale<br>assessment of cultural ecosystem services                                                                            | ECOSYSTEM SERVICES                  | 10.1016/j.ecoser.2016.07.0<br>15    |
| Albert, C; Galler, C; Hermes, J;<br>Neuendorf, F; von Haaren, C; Lovett,<br>A                       | 2016 | Applying ecosystem services indicators in landscape<br>planning and management: The ES-in-Planning<br>framework                                                          | ECOLOGICAL INDICATORS               | 10.1016/j.ecolind.2015.03.<br>029   |
